# Supplementary material for: Homochiral Dy2 single-molecule magnets with strong magneto-optical Faraday effects and strong third-harmonic generation
Source: Royal Society of Chemistry journal article supplement (doi:10.1039/d4qi00691g), 2024-01-01
Supplement: d4qi00691g1.pdf [file d4qi00691g1.pdf]

## Supporting Information

### Homochiral Dy<sub>2</sub> single-molecule magnets with strong magneto-optical Faraday effect and strong third-harmonic generation

Cai-Ming Liu<sup>\*a</sup>, Rong Sun<sup>b</sup>, Xiang Hao<sup>a</sup>, Xi-Li Li<sup>c</sup> and Bing-Wu Wang<sup>\*c</sup>

<sup>a</sup> Beijing National Laboratory for Molecular Sciences, CAS Key Laboratory for Organic Solids, Institute of Chemistry, Chinese Academy of Sciences, Beijing 100190, China. Email: [cmliu@iccas.ac.cn](mailto:cmliu@iccas.ac.cn)

<sup>b</sup> State Key Laboratory of Rare Earth Materials Chemistry and Applications, College of Chemistry and Molecular Engineering, Peking University, Beijing 100871, China. Email: [wangbw@pku.edu.cn](mailto:wangbw@pku.edu.cn)

<sup>c</sup> Henan Provincial Key Laboratory of Surface and Interface Science, Zhengzhou University of Light Industry, Zhengzhou 450002, China.

#### Contents

1. Table S1. Crystal data and structural refinement parameters.
2. Tables S2-S5. Dy (III) ion geometry analysis by SHAPE 2.1 software for *D-1*, *D-2*, *D-3* and *D-4*.
3. Figs. S1-S4. *M* versus *H/T* plots at 2-6 K of *D-1*, *D-2*, *D-3* and *D-4*.
4. Fig. S5. Hysteresis loop for *D-1* at 1.9 K.
5. Fig. S6. Plots of  $\chi''$  versus *T* for *D-1* ( $H_{dc} = 1500$  Oe) (a). Frequency dependence of  $\chi''$  for *D-1* at 1500 Oe (b). Plot of  $\ln(\tau)$  versus  $1/T$  for *D-1* ( $H_{dc} = 1500$  Oe) (c).
6. Fig. S7. Hysteresis loop for *D-2* at 1.9 K.
7. Fig. S8. Plots of  $\chi''$  versus *T* for *D-2* ( $H_{dc} = 1500$  Oe) (a). Frequency dependence of  $\chi''$  for *D-2* at 1500 Oe (b). Plot of  $\ln(\tau)$  versus  $1/T$  for *D-2* ( $H_{dc} = 1500$  Oe) (c).
8. Fig. S9. Hysteresis loop for *D-3* at 1.9 K.
9. Fig. S10. Plots of  $\chi''$  versus *T* for *D-3* ( $H_{dc} = 1500$  Oe) (a). Frequency dependence of  $\chi''$  for *D-3* at 1500 Oe (b). Plot of  $\ln(\tau)$  versus  $1/T$  for *D-3* ( $H_{dc} = 1500$  Oe) (c).
10. Fig. S11. Hysteresis loop for *D-4* at 1.9 K.
11. Fig. S12. Plots of  $\chi''$  versus *T* for *D-4* ( $H_{dc} = 1500$  Oe) (a). Frequency dependence of  $\chi''$  for *D-4* at 1500 Oe (b). Plot of  $\ln(\tau)$  versus  $1/T$  for *D-4* ( $H_{dc} = 1500$  Oe) (c).

12. Tables S6-S9. Calculated energy levels and  $g(g_x, g_y, g_z)$  tensors of the lowest Kramers doublets (KDs) of individual Dy(III) fragment for *D-1*, *D-2*, *D-3* and *D-4*.
13. Tables S10- S13. Wave functions with definite projection of the total moment  $|m_j\rangle$  for the lowest three Kramers doublets (KDs) of individual Dy<sup>3+</sup> fragments in *D-1*, *D-2*, *D-3* and *D-4*.
14. Fig. S13. Plots of  $\chi T$  versus  $T$  of *D-1*, *D-2*, *D-3* and *D-4* with the simulated results.
15. Figs. S14-S17. The orientations of easy axis of the KDs on Dy<sup>3+</sup> for *D-1*, *D-2*, *D-3* and *D-4*.
16. Figs. S18-S21. MCD spectra of *D-1/L-1*, *D-2/L-2*, *D-3/L-3* and *D-4/L-4*.
17. Figs. S22-S25. The wavelength-dependent  $g_{\text{MCD}}$  curves of *D-1/L-1*, *D-2/L-2*, *D-3/L-3* and *D-4/L-4*.
18. Fig. S26. SHG spectra of crystalline samples of *D-1*, *D-2*, *D-3*, *D-4* and KDP (illustration) under excitation at  $\lambda = 1550$  nm ( $T_{\text{int}} = 0.5$  s).

**Table S1.** Crystal data and structural refinement parameters for *D-1/L-1*, *D-2/L-2*, *D-3/L-3*, *D-4/L-4*.

|                                            | <i>D-1</i>                                                                                        | <i>L-1</i>                                                                                        | <i>D-2</i>                                                                                       | <i>L-2</i>                                                                                       | <i>D-3</i>                                                                                         | <i>L-3</i>                                                                                         | <i>D-4</i>                                                                                        | <i>L-4</i>                                                                                        |
|--------------------------------------------|---------------------------------------------------------------------------------------------------|---------------------------------------------------------------------------------------------------|--------------------------------------------------------------------------------------------------|--------------------------------------------------------------------------------------------------|----------------------------------------------------------------------------------------------------|----------------------------------------------------------------------------------------------------|---------------------------------------------------------------------------------------------------|---------------------------------------------------------------------------------------------------|
| formula                                    | C <sub>56</sub> H <sub>68</sub> F <sub>6</sub><br>N <sub>10</sub> O <sub>14</sub> Dy <sub>2</sub> | C <sub>56</sub> H <sub>68</sub> F <sub>6</sub><br>N <sub>10</sub> O <sub>14</sub> Dy <sub>2</sub> | C <sub>58</sub> H <sub>70</sub> Dy <sub>2</sub><br>F <sub>6</sub> N <sub>8</sub> O <sub>14</sub> | C <sub>58</sub> H <sub>70</sub> Dy <sub>2</sub><br>F <sub>6</sub> N <sub>8</sub> O <sub>14</sub> | C <sub>60</sub> H <sub>62</sub> Dy <sub>2</sub><br>F <sub>14</sub> N <sub>10</sub> O <sub>12</sub> | C <sub>60</sub> H <sub>62</sub> Dy <sub>2</sub><br>F <sub>14</sub> N <sub>10</sub> O <sub>12</sub> | C <sub>62</sub> H <sub>69</sub> Dy <sub>2</sub><br>F <sub>14</sub> N <sub>8</sub> O <sub>14</sub> | C <sub>62</sub> H <sub>69</sub> Dy <sub>2</sub><br>F <sub>14</sub> N <sub>8</sub> O <sub>14</sub> |
| $F_w$                                      | 1544.20                                                                                           | 1544.20                                                                                           | 1542.22                                                                                          | 1542.22                                                                                          | 1706.19                                                                                            | 1706.19                                                                                            | 1741.25                                                                                           | 1741.25                                                                                           |
| crystal system                             | monoclinic                                                                                        | monoclinic                                                                                        | monoclinic                                                                                       | monoclinic                                                                                       | triclinic                                                                                          | triclinic                                                                                          | monoclinic                                                                                        | monoclinic                                                                                        |
| space group                                | $P2_1$                                                                                            | $P2_1$                                                                                            | $P2_1$                                                                                           | $P2_1$                                                                                           | $P1$                                                                                               | $P1$                                                                                               | $P2_1$                                                                                            | $P2_1$                                                                                            |
| $a$ [Å]                                    | 11.9091(2)                                                                                        | 11.91880(16)                                                                                      | 11.9571(2)                                                                                       | 11.94360(18)                                                                                     | 11.3419(2)                                                                                         | 11.3542(2)                                                                                         | 18.0384(5)                                                                                        | 18.0064(4)                                                                                        |
| $b$ [Å]                                    | 18.6155(2)                                                                                        | 18.5949(3)                                                                                        | 18.4949(3)                                                                                       | 18.4933(3)                                                                                       | 16.6925(3)                                                                                         | 16.7025(3)                                                                                         | 10.5248(2)                                                                                        | 10.5352(2)                                                                                        |
| $c$ [Å]                                    | 13.9636(2)                                                                                        | 13.9673(2)                                                                                        | 14.1630(2)                                                                                       | 14.1704(2)                                                                                       | 18.8529(4)                                                                                         | 18.8605(4)                                                                                         | 18.9442(5)                                                                                        | 18.9592(4)                                                                                        |
| $\alpha$ [°]                               | 90.00                                                                                             | 90.00                                                                                             | 90.00                                                                                            | 90.00                                                                                            | 70.521(2)                                                                                          | 70.275(2)                                                                                          | 90.00                                                                                             | 90.00                                                                                             |
| $\beta$ [°]                                | 93.0150(10)                                                                                       | 92.9810(12)                                                                                       | 93.4050(10)                                                                                      | 93.2910(14)                                                                                      | 89.7460(10)                                                                                        | 89.9510(10)                                                                                        | 108.627(3)                                                                                        | 108.460(2)                                                                                        |
| $\gamma$ [°]                               | 90.00                                                                                             | 90.00                                                                                             | 90.00                                                                                            | 90.00                                                                                            | 82.7060(10)                                                                                        | 82.8120(10)                                                                                        | 90.00                                                                                             | 90.00                                                                                             |
| $V$ [Å <sup>3</sup> ]                      | 3091.36(8)                                                                                        | 3091.37(8)                                                                                        | 3126.55(9)                                                                                       | 3124.75(8)                                                                                       | 3335.05(12)                                                                                        | 3337.16(12)                                                                                        | 3408.17(16)                                                                                       | 3411.52(13)                                                                                       |
| $Z$                                        | 2                                                                                                 | 2                                                                                                 | 2                                                                                                | 2                                                                                                | 2                                                                                                  | 2                                                                                                  | 2                                                                                                 | 2                                                                                                 |
| $\rho_{\text{calc}}$ [g cm <sup>-3</sup> ] | 1.659                                                                                             | 1.659                                                                                             | 1.638                                                                                            | 1.639                                                                                            | 1.701                                                                                              | 1.698                                                                                              | 1.697                                                                                             | 1.692                                                                                             |
| $\mu$ [mm <sup>-1</sup> ]                  | 2.487                                                                                             | 2.487                                                                                             | 2.458                                                                                            | 2.460                                                                                            | 2.329                                                                                              | 2.327                                                                                              | 2.282                                                                                             | 2.280                                                                                             |
| $T$ [K]                                    | 170                                                                                               | 170                                                                                               | 170                                                                                              | 170                                                                                              | 170                                                                                                | 170                                                                                                | 170                                                                                               | 170                                                                                               |
| $\lambda$ [Å]                              | 0.71073                                                                                           | 0.71073                                                                                           | 0.71073                                                                                          | 0.71073                                                                                          | 0.71073                                                                                            | 0.71073                                                                                            | 0.71073                                                                                           | 0.71073                                                                                           |
| reflections collected                      | 53168                                                                                             | 53508                                                                                             | 49359                                                                                            | 62716                                                                                            | 89540                                                                                              | 89477                                                                                              | 50504                                                                                             | 46717                                                                                             |
| unique reflections                         | 16564                                                                                             | 16571                                                                                             | 16769                                                                                            | 16650                                                                                            | 24878                                                                                              | 24868                                                                                              | 18259                                                                                             | 12053                                                                                             |
| observed reflections                       | 16145                                                                                             | 15756                                                                                             | 16048                                                                                            | 15584                                                                                            | 23781                                                                                              | 22026                                                                                              | 16389                                                                                             | 11445                                                                                             |
| parameters                                 | 806                                                                                               | 806                                                                                               | 805                                                                                              | 805                                                                                              | 1700                                                                                               | 1700                                                                                               | 913                                                                                               | 915                                                                                               |
| GoF[ $I \geq 2\sigma(I)$ ]                 | 1.024                                                                                             | 1.047                                                                                             | 1.016                                                                                            | 1.027                                                                                            | 1.068                                                                                              | 1.030                                                                                              | 1.045                                                                                             | 1.035                                                                                             |
| $R_1$ [ $I \geq 2\sigma(I)$ ]              | 0.0177                                                                                            | 0.0222                                                                                            | 0.0211                                                                                           | 0.0254                                                                                           | 0.0628                                                                                             | 0.0548                                                                                             | 0.0398                                                                                            | 0.0317                                                                                            |
| $wR_2$ [ $I \geq 2\sigma(I)$ ]             | 0.0429                                                                                            | 0.0526                                                                                            | 0.0507                                                                                           | 0.0598                                                                                           | 0.1722                                                                                             | 0.1455                                                                                             | 0.1029                                                                                            | 0.0804                                                                                            |
| Flack value                                | -0.007(2)                                                                                         | 0.016(4)                                                                                          | -0.006(4)                                                                                        | -0.019(6)                                                                                        | 0.018(17)                                                                                          | 0.037(6)                                                                                           | 0.011(7)                                                                                          | 0.012(9)                                                                                          |
| CCDC                                       | 2308016                                                                                           | 2308017                                                                                           | 2308018                                                                                          | 2308019                                                                                          | 2308020                                                                                            | 2308021                                                                                            | 2308022                                                                                           | 2308023                                                                                           |

**Table S2.** Dy (III) ion geometry analysis by SHAPE 2.1 software for *D-1*.

| Configuration                                           | ABOXIY<br><b>Dy1</b> | ABOXIY<br><b>Dy2</b> |
|---------------------------------------------------------|----------------------|----------------------|
| Octagon( $D_{8h}$ )                                     | 32.232               | 32.403               |
| Heptagonal pyramid( $C_{7v}$ )                          | 21.806               | 21.495               |
| Hexagonal bipyramid( $D_{6h}$ )                         | 11.660               | 12.296               |
| Cube ( $O_h$ )                                          | 7.722                | 8.277                |
| Square antiprism ( $D_{4d}$ )                           | 2.585                | 2.999                |
| Triangular dodecahedron ( $D_{2d}$ )                    | <b>1.726</b>         | <b>1.487</b>         |
| Johnson gyrobifastigium J26 ( $D_{2d}$ )                | 12.057               | 12.518               |
| Johnson elongated triangular bipyramid J14 ( $D_{3h}$ ) | 26.094               | 26.098               |
| Biaugmented trigonal prism J50 ( $C_{2v}$ )             | 3.482                | 3.654                |
| Biaugmented trigonal prism ( $C_{2v}$ )                 | 2.291                | 2.420                |
| Snub diphenoid J84 ( $D_{2d}$ )                         | 5.024                | 4.685                |
| Triakis tetrahedron ( $T_d$ )                           | 8.591                | 9.072                |
| Elongated trigonal bipyramid ( $D_{3h}$ )               | 23.298               | 23.074               |

**Table S3.** Dy (III) ion geometry analysis by SHAPE 2.1 software for *D-2*.

| Configuration                                           | ABOXIY<br><b>Dy1</b> | ABOXIY<br><b>Dy2</b> |
|---------------------------------------------------------|----------------------|----------------------|
| Octagon( $D_{8h}$ )                                     | 32.235               | 32.327               |
| Heptagonal pyramid( $C_{7v}$ )                          | 21.879               | 21.434               |
| Hexagonal bipyramid( $D_{6h}$ )                         | 11.763               | 12.297               |
| Cube ( $O_h$ )                                          | 7.903                | 8.356                |
| Square antiprism ( $D_{4d}$ )                           | 2.596                | 3.059                |
| Triangular dodecahedron ( $D_{2d}$ )                    | <b>1.784</b>         | <b>1.530</b>         |
| Johnson gyrobifastigium J26 ( $D_{2d}$ )                | 11.944               | 12.438               |
| Johnson elongated triangular bipyramid J14 ( $D_{3h}$ ) | 26.665               | 26.256               |
| Biaugmented trigonal prism J50 ( $C_{2v}$ )             | 3.370                | 3.655                |
| Biaugmented trigonal prism ( $C_{2v}$ )                 | 2.130                | 2.396                |
| Snub diphenoid J84 ( $D_{2d}$ )                         | 5.106                | 4.719                |
| Triakis tetrahedron ( $T_d$ )                           | 8.745                | 9.157                |
| Elongated trigonal bipyramid ( $D_{3h}$ )               | 23.274               | 23.229               |

**Table S4.** Dy (III) ion geometry analysis by SHAPE 2.1 software for *D-3*.

| Configuration                                           | ABOXIY<br><b>Dy1</b> | ABOXIY<br><b>Dy2</b> | ABOXIY<br><b>Dy3</b> | ABOXIY<br><b>Dy4</b> |
|---------------------------------------------------------|----------------------|----------------------|----------------------|----------------------|
| Octagon( $D_{8h}$ )                                     | 30.500               | 30.053               | 30.942               | 31.076               |
| Heptagonal pyramid( $C_{7v}$ )                          | 21.402               | 22.185               | 22.268               | 22.092               |
| Hexagonal bipyramid( $D_{6h}$ )                         | 14.775               | 14.809               | 14.455               | 12.365               |
| Cube ( $O_h$ )                                          | 12.478               | 12.788               | 11.974               | 10.412               |
| Square antiprism ( $D_{4d}$ )                           | 4.622                | 5.003                | 4.285                | 3.944                |
| Triangular dodecahedron ( $D_{2d}$ )                    | <b>2.589</b>         | 2.590                | <b>2.406</b>         | 2.844                |
| Johnson gyrobifastigium J26 ( $D_{2d}$ )                | 11.770               | 11.154               | 10.884               | 10.337               |
| Johnson elongated triangular bipyramid J14 ( $D_{3h}$ ) | 22.146               | 21.740               | 22.250               | 22.052               |
| Biaugmented trigonal prism J50 ( $C_{2v}$ )             | 3.040                | <b>2.589</b>         | 3.043                | 3.014                |
| Biaugmented trigonal prism ( $C_{2v}$ )                 | 2.896                | 2.600                | 2.955                | <b>2.564</b>         |
| Snub diphenoid J84 ( $D_{2d}$ )                         | 3.463                | 3.058                | 2.888                | 3.525                |
| Triakis tetrahedron ( $T_d$ )                           | 13.269               | 13.587               | 12.746               | 11.224               |
| Elongated trigonal bipyramid ( $D_{3h}$ )               | 20.409               | 20.089               | 20.721               | 20.406               |

**Table S5.** Dy (III) ion geometry analysis by SHAPE 2.1 software for *D-4*.

| Configuration                                           | ABOXIY<br><b>Dy1</b> | ABOXIY<br><b>Dy2</b> |
|---------------------------------------------------------|----------------------|----------------------|
| Octagon( $D_{8h}$ )                                     | 32.525               | 33.076               |
| Heptagonal pyramid( $C_{7v}$ )                          | 21.233               | 22.566               |
| Hexagonal bipyramid( $D_{6h}$ )                         | 10.882               | 10.357               |
| Cube ( $O_h$ )                                          | 7.678                | 7.297                |
| Square antiprism ( $D_{4d}$ )                           | 3.020                | 2.824                |
| Triangular dodecahedron ( $D_{2d}$ )                    | <b>2.193</b>         | <b>2.365</b>         |
| Johnson gyrobifastigium J26 ( $D_{2d}$ )                | 11.150               | 10.941               |
| Johnson elongated triangular bipyramid J14 ( $D_{3h}$ ) | 25.509               | 26.361               |
| Biaugmented trigonal prism J50 ( $C_{2v}$ )             | 3.801                | 3.710                |
| Biaugmented trigonal prism ( $C_{2v}$ )                 | 2.496                | 2.451                |
| Snub diphenoid J84 ( $D_{2d}$ )                         | 5.605                | 6.007                |
| Triakis tetrahedron ( $T_d$ )                           | 8.541                | 8.098                |
| Elongated trigonal bipyramid ( $D_{3h}$ )               | 22.925               | 22.986               |

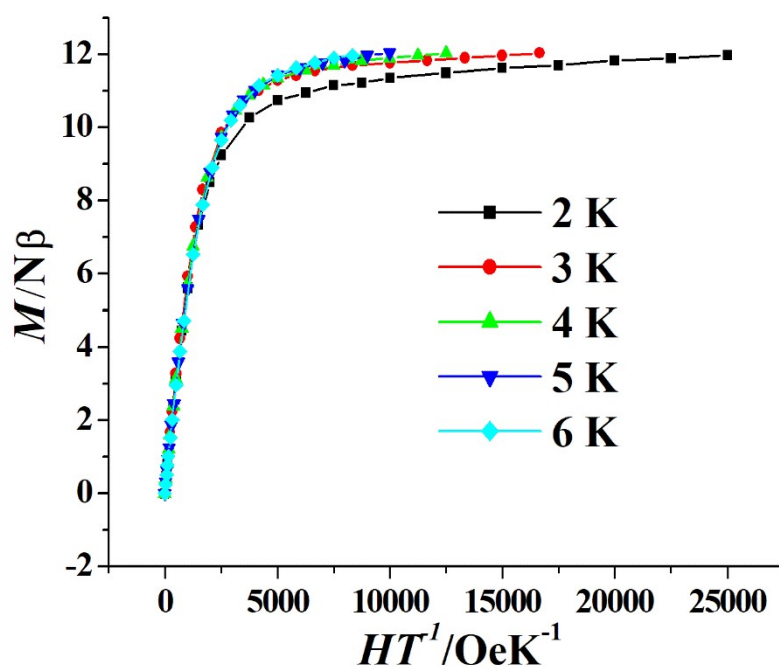

**Fig. S1.**  $M$  versus  $H/T$  plots at 2-6 K of *D-1*.

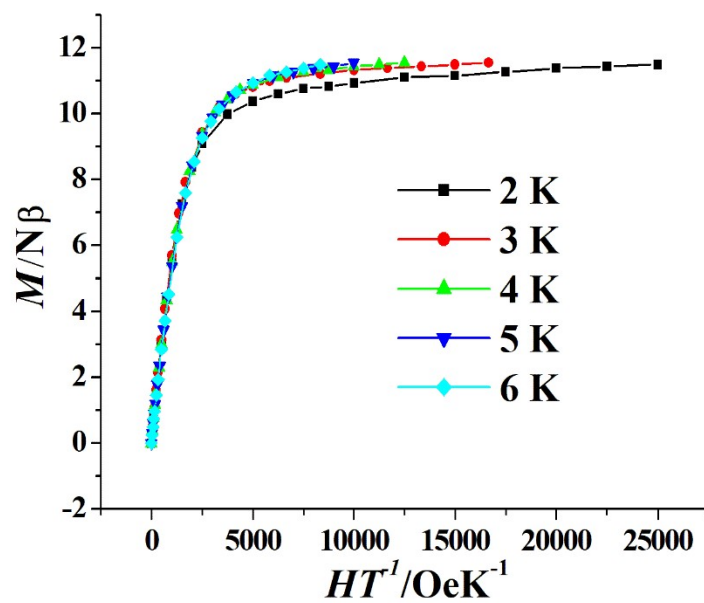

Fig. S2.  $M$  versus  $H/T$  plots at 2-6 K of  $D-2$ .

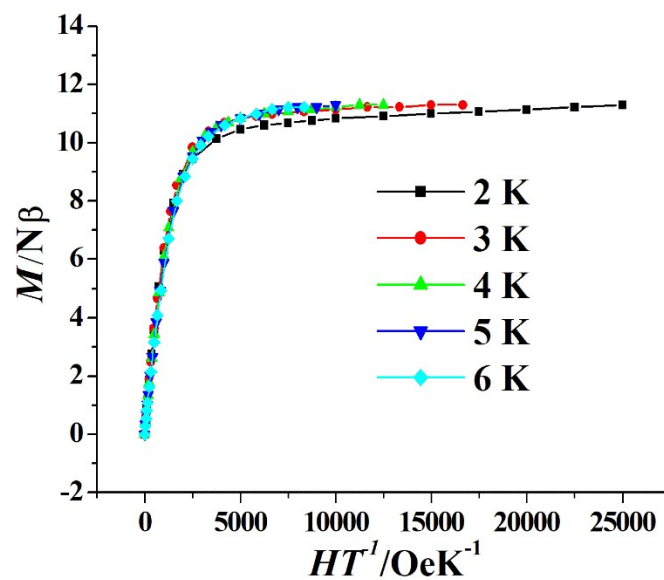

Fig. S3.  $M$  versus  $H/T$  plots at 2-6 K of  $D-3$ .

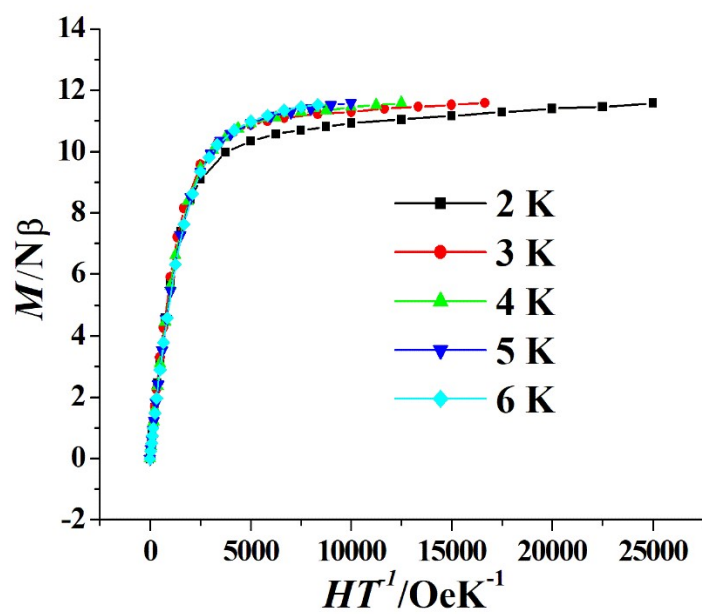

**Fig. S4.**  $M$  versus  $H/T$  plots at 2-6 K of  $D-4$ .

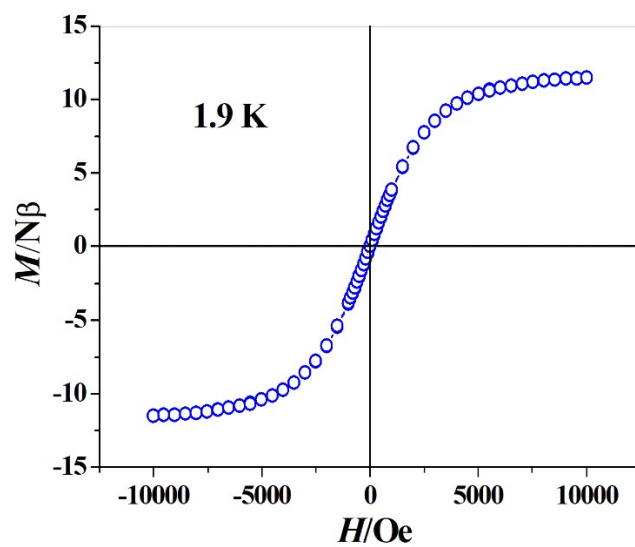

**Fig. S5.** Hysteresis loop for  $D-1$  at 1.9 K.

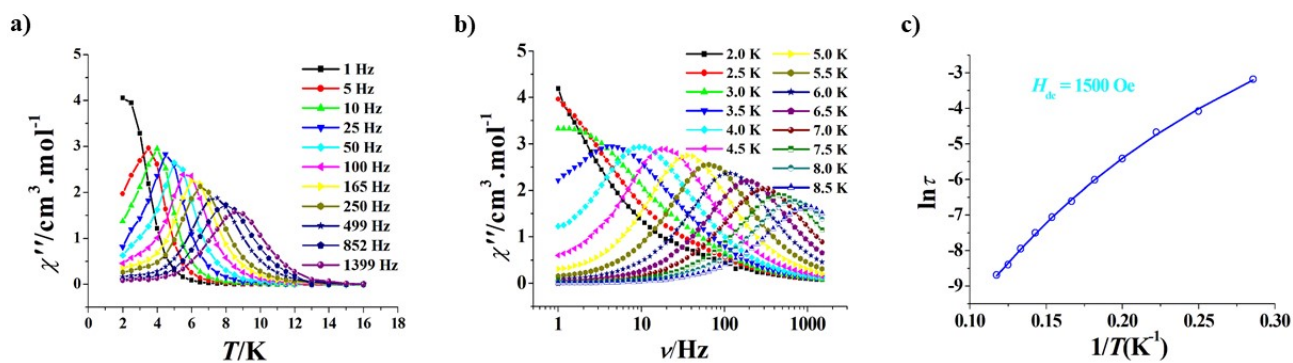

**Fig. S6.** Plots of  $\chi''$  versus  $T$  for  $D-1$  ( $H_{dc} = 1500$  Oe) (a). Frequency dependence of  $\chi''$  for  $D-1$  at 1500 Oe (b). Plot of  $\ln(\tau)$  versus  $1/T$  for  $D-1$  ( $H_{dc} = 1500$  Oe), the solid line represents the best fitting with Orbach plus Raman (c).

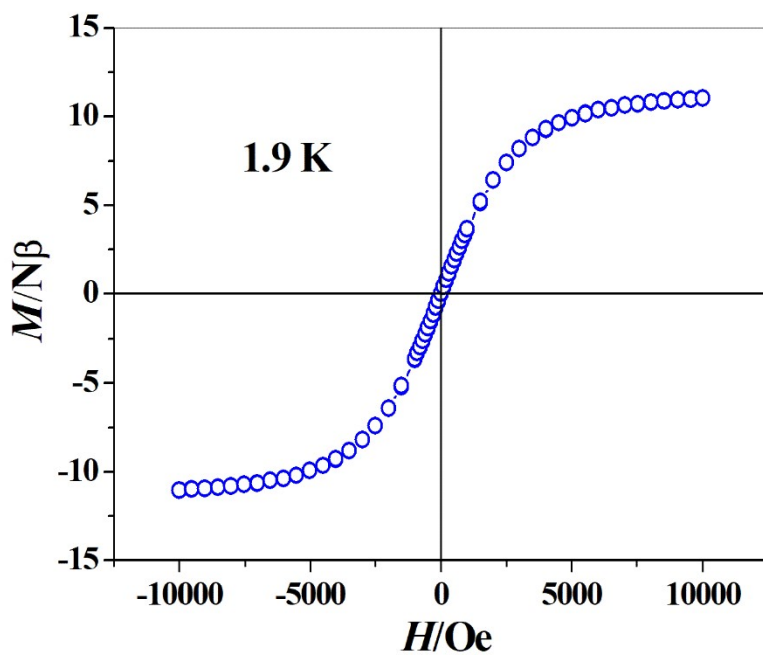

**Fig. S7.** Hysteresis loop for  $D-2$  at 1.9 K.



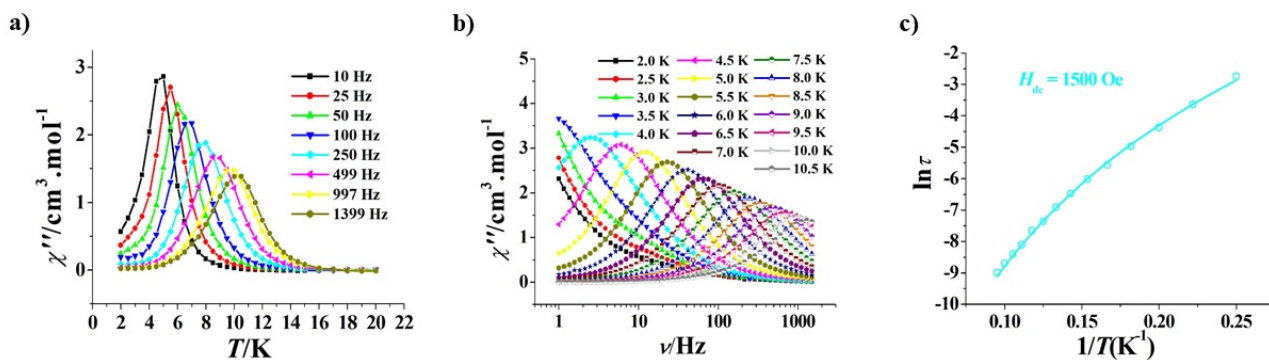

**Fig. S8.** Plots of  $\chi''$  versus  $T$  for  $D-2$  ( $H_{dc} = 1500$  Oe) (a). Frequency dependence of  $\chi''$  for  $D-2$  at 1500 Oe (b). Plot of  $\ln(\tau)$  versus  $1/T$  for  $D-2$  ( $H_{dc} = 1500$  Oe), the solid line represents the best fitting with Orbach plus Raman (c).

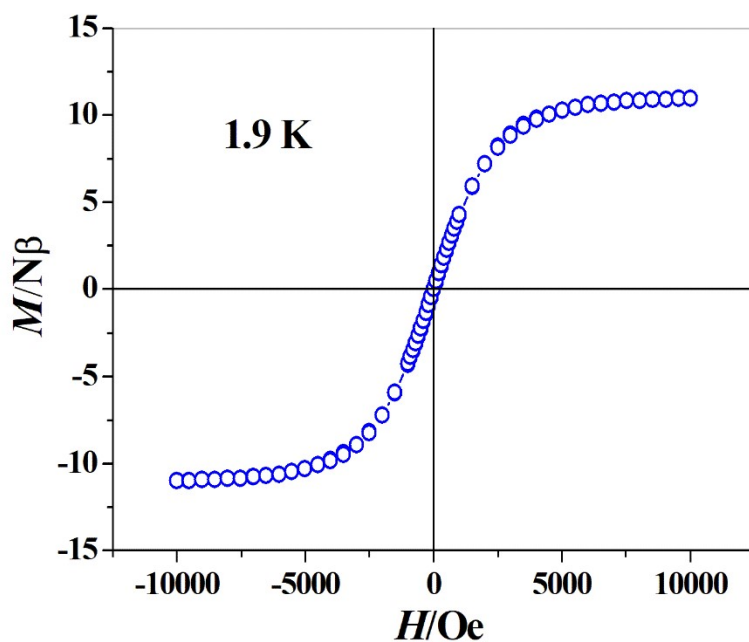

**Fig. S9.** Hysteresis loop for  $D-3$  at 1.9 K.

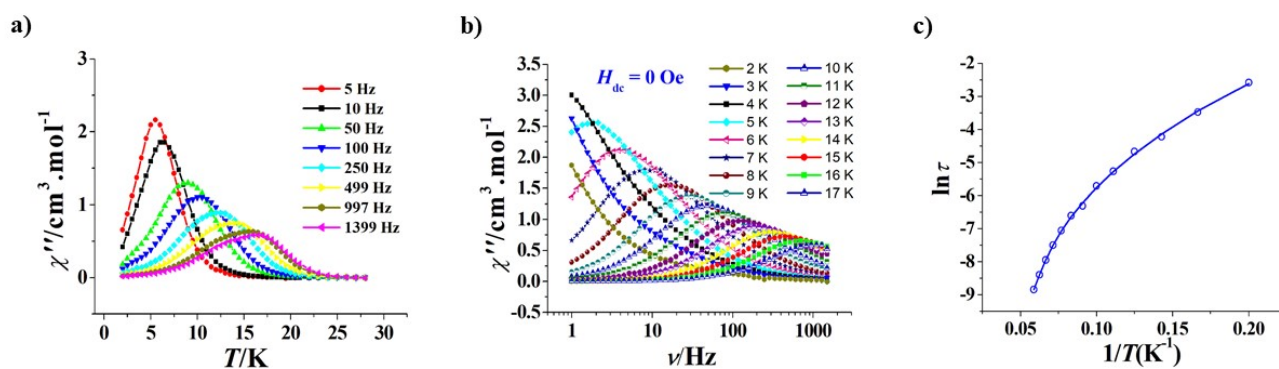

**Fig. S10.** Plots of  $\chi''$  versus  $T$  for  $D-3$  ( $H_{dc} = 1500$  Oe) (a). Frequency dependence of  $\chi''$  for  $D-3$  at 1500 Oe (b). Plot of  $\ln(\tau)$  versus  $1/T$  for  $D-3$  ( $H_{dc} = 1500$  Oe), the solid line represents the best fitting with Orbach plus Raman (c).

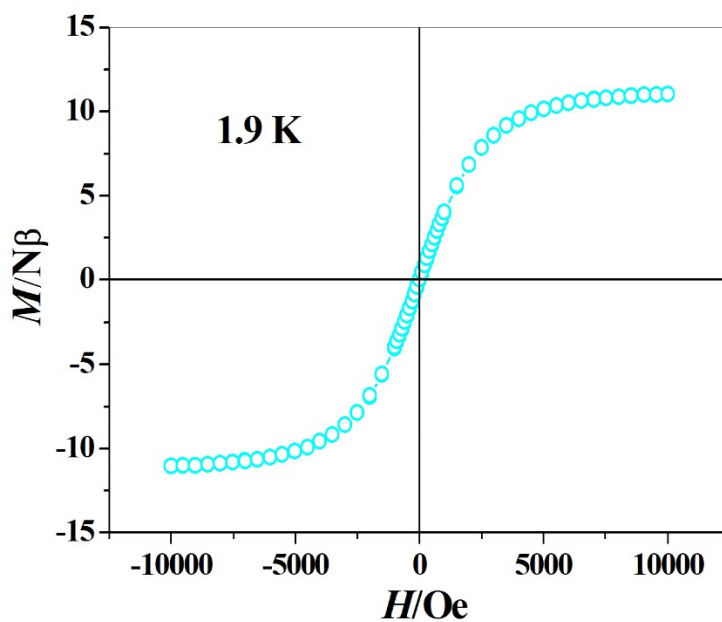

**Fig. S11.** Hysteresis loop for  $D-4$  at 1.9 K.

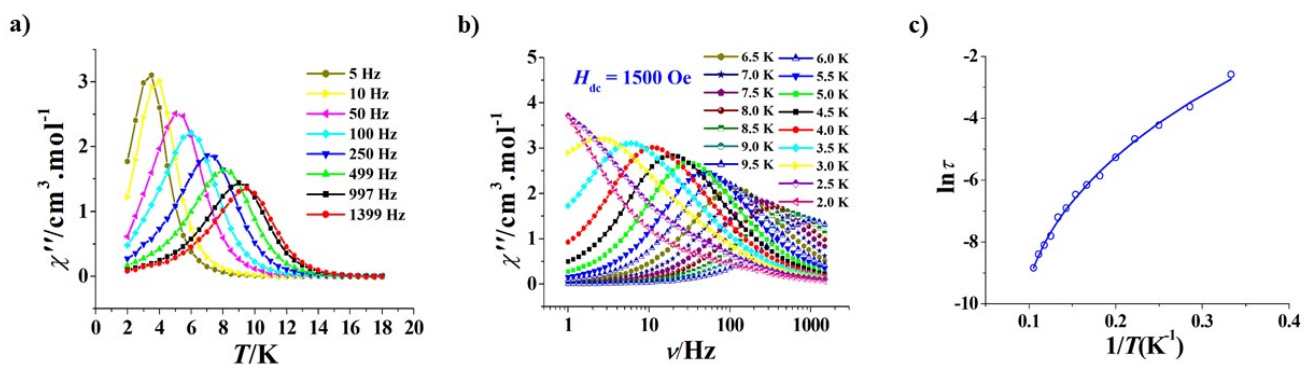

**Fig. S12.** Plots of  $\chi''$  versus  $T$  for D-4 ( $H_{dc} = 1500$  Oe) (a). Frequency dependence of  $\chi''$  for D-4 at 1500 Oe (b). Plot of  $\ln(\tau)$  versus  $1/T$  for D-4 ( $H_{dc} = 1500$  Oe), the solid line represents the best fitting with Orbach plus Raman (c).

## Supporting Information for theoretical calculations

*Ab initio* calculations were performed with MOLCAS 8.1 program.<sup>1</sup> All atoms are described by relativistic atomic natural orbital (ANO) basis sets from the MOLCAS ANO-RCC library: ANO-RCC-VTZP for Dy (III) ion; VTZ for coordinated O and N; VDZ for other atoms, accounting scalar relativistic contractions. A second-order Douglas-Kroll-Hess Hamiltonian was employed. The spin-orbit coupling was handled separately through the restricted-active-space state interaction procedure (RASSI-SO). Active electrons in seven active spaces include all *f* electrons (CAS (9, 7)) of Dy (III) in the CASSCF calculation.

The intramolecular interaction between two Dy (III) ions was also calculated using theoretical method. Firstly, each Dy (III) fragment was calculated using CASSCF to obtain the corresponding magnetic properties. Then, the exchange interaction between the magnetic centers is considered within the Lines model<sup>2</sup>, while the account of the dipole-dipole magnetic coupling is treated exactly. The Lines model is effective and has been successfully used widely in the research field of f-element single-molecule magnets. For this compound, there is only one type of *J* (Dy-Dy). The Hamiltonian is as follows,

$$\hat{H}_{exch} = -J_{total} \hat{S}_{Dy1} \hat{S}_{Dy2}$$

Where the  $J_{total}$  is the parameter of the total magnetic interaction ( $J_{total} = J_{dip} + J_{exch}$ ) between magnetic center ions. The  $\hat{S}_{Dy1} = \pm 1/2$  are the ground pseudospin on the Dy (III) sites. The dipolar magnetic coupling can be calculated in Ising approximation, while the exchange coupling constant was fitted through comparison of the computed and measured magnetic susceptibility and molar magnetization using the POLY\_ANISO program.<sup>3</sup>

**Table S6.** Calculated energy levels (K) and  $g$  ( $g_x, g_y, g_z$ ) tensors of the lowest Kramers doublets (KDs) of individual Dy(III) fragment for *D-1*.

| KDs | Dy1     |        | Dy2     |        |
|-----|---------|--------|---------|--------|
|     | $E / K$ | $g$    | $E / K$ | $g$    |
| 1   | 0.0     | 0.019  | 0.0     | 0.023  |
|     |         | 0.024  |         | 0.029  |
|     |         | 19.541 |         | 19.543 |
| 2   | 183.6   | 0.193  | 192.2   | 0.095  |
|     |         | 0.213  |         | 0.111  |
|     |         | 16.634 |         | 16.548 |
| 3   | 374.2   | 1.886  | 363.2   | 9.733  |
|     |         | 2.845  |         | 7.516  |
|     |         | 12.211 |         | 3.113  |
| 4   | 436.3   | 1.168  | 404.8   | 2.129  |
|     |         | 3.142  |         | 3.964  |
|     |         | 15.323 |         | 11.844 |
| 5   | 509.3   | 3.257  | 488.2   | 4.501  |
|     |         | 5.958  |         | 6.612  |
|     |         | 9.981  |         | 9.347  |
| 6   | 621.7   | 0.286  | 580.8   | 0.728  |
|     |         | 1.346  |         | 1.127  |
|     |         | 16.056 |         | 16.968 |
| 7   | 712.0   | 0.069  | 697.0   | 0.061  |
|     |         | 1.252  |         | 0.734  |
|     |         | 17.545 |         | 18.464 |
| 8   | 766.5   | 0.349  | 775.5   | 0.162  |
|     |         | 0.802  |         | 0.413  |
|     |         | 19.056 |         | 19.342 |

**Table S7.** Calculated energy levels (K) and  $g$  ( $g_x, g_y, g_z$ ) tensors of the lowest Kramers doublets (KDs) of individual Dy(III) fragment for *D-2*.

| KDs | Dy1     |        | Dy2     |        |
|-----|---------|--------|---------|--------|
|     | $E / K$ | $g$    | $E / K$ | $g$    |
| 1   | 0.0     | 0.024  | 0.0     | 0.014  |
|     |         | 0.037  |         | 0.020  |
|     |         | 19.504 |         | 19.460 |
| 2   | 180.3   | 0.250  | 193.0   | 0.098  |
|     |         | 0.310  |         | 0.107  |
|     |         | 16.551 |         | 16.484 |
| 3   | 344.6   | 3.115  | 384.3   | 9.387  |
|     |         | 4.819  |         | 7.514  |
|     |         | 11.361 |         | 2.725  |
| 4   | 394.5   | 0.429  | 419.2   | 2.998  |
|     |         | 2.705  |         | 3.908  |
|     |         | 14.270 |         | 10.927 |
| 5   | 470.1   | 2.664  | 502.7   | 4.029  |
|     |         | 5.531  |         | 5.605  |
|     |         | 9.825  |         | 10.888 |
| 6   | 602.2   | 0.278  | 583.0   | 0.969  |
|     |         | 1.745  |         | 1.296  |
|     |         | 15.339 |         | 17.113 |
| 7   | 683.6   | 0.272  | 711.1   | 0.548  |
|     |         | 1.393  |         | 1.633  |
|     |         | 17.214 |         | 16.758 |
| 8   | 735.9   | 0.327  | 740.7   | 0.374  |
|     |         | 0.643  |         | 2.100  |
|     |         | 19.072 |         | 17.329 |

**Table S8.** Calculated energy levels (K) and  $g$  ( $g_x, g_y, g_z$ ) tensors of the lowest Kramers doublets (KDs) of individual Dy(III) fragment for *D-3*.

| KDs | Dy1   |        | Dy2   |        | Dy3   |        | Dy4   |        |
|-----|-------|--------|-------|--------|-------|--------|-------|--------|
|     | $E/K$ | $g$    | $E/K$ | $g$    | $E/K$ | $g$    | $E/K$ | $g$    |
| 1   | 0.0   | 0.007  | 0.0   | 0.003  | 0.0   | 0.006  | 0.0   | 0.006  |
|     |       | 0.010  |       | 0.005  |       | 0.009  |       | 0.012  |
|     |       | 19.679 |       | 19.641 |       | 19.691 |       | 19.485 |
| 2   | 294.5 | 0.099  | 294.5 | 0.032  | 304.5 | 0.064  | 252.8 | 0.107  |
|     |       | 0.296  |       | 0.084  |       | 0.161  |       | 0.273  |
|     |       | 16.916 |       | 16.820 |       | 16.896 |       | 16.445 |
| 3   | 419.4 | 0.210  | 429.5 | 0.182  | 472.1 | 0.580  | 356.7 | 0.243  |
|     |       | 0.607  |       | 0.364  |       | 1.483  |       | 0.743  |
|     |       | 18.284 |       | 19.145 |       | 17.207 |       | 18.380 |
| 4   | 498.5 | 0.998  | 519.8 | 1.350  | 533.6 | 0.818  | 431.8 | 0.843  |
|     |       | 4.254  |       | 1.581  |       | 4.336  |       | 2.099  |
|     |       | 11.017 |       | 12.469 |       | 11.894 |       | 14.541 |
| 5   | 532.1 | 0.501  | 577.4 | 0.164  | 582.0 | 1.681  | 505.0 | 0.316  |
|     |       | 4.115  |       | 2.918  |       | 4.046  |       | 3.453  |
|     |       | 12.213 |       | 10.674 |       | 8.333  |       | 9.222  |
| 6   | 601.6 | 2.800  | 660.4 | 4.968  | 681.8 | 2.475  | 593.3 | 7.489  |
|     |       | 3.554  |       | 5.471  |       | 6.196  |       | 7.151  |
|     |       | 10.470 |       | 8.243  |       | 11.742 |       | 3.723  |
| 7   | 688.5 | 2.821  | 701.6 | 1.709  | 708.4 | 1.240  | 634.8 | 1.546  |
|     |       | 4.631  |       | 1.980  |       | 3.760  |       | 2.266  |
|     |       | 11.148 |       | 15.113 |       | 10.484 |       | 16.608 |
| 8   | 774.4 | 0.665  | 764.4 | 0.745  | 776.1 | 0.726  | 660.9 | 1.050  |
|     |       | 1.950  |       | 1.060  |       | 1.555  |       | 1.300  |
|     |       | 17.893 |       | 17.931 |       | 17.993 |       | 16.866 |

**Table S9.** Calculated energy levels (K) and  $g$  ( $g_x, g_y, g_z$ ) tensors of the lowest Kramers doublets (KDs) of individual Dy(III) fragment for *D-4*.

| KDs | Dy1     |        | Dy2     |        |
|-----|---------|--------|---------|--------|
|     | $E / K$ | $g$    | $E / K$ | $g$    |
| 1   | 0.0     | 0.006  | 0.0     | 0.001  |
|     |         | 0.029  |         | 0.016  |
|     |         | 19.454 |         | 19.532 |
| 2   | 161.0   | 0.163  | 174.5   | 0.194  |
|     |         | 0.238  |         | 0.249  |
|     |         | 16.575 |         | 16.674 |
| 3   | 314.0   | 10.126 | 367.5   | 2.863  |
|     |         | 7.358  |         | 4.567  |
|     |         | 3.178  |         | 11.503 |
| 4   | 347.8   | 1.823  | 426.8   | 0.511  |
|     |         | 3.767  |         | 3.423  |
|     |         | 12.664 |         | 14.697 |
| 5   | 432.5   | 3.859  | 510.6   | 3.834  |
|     |         | 6.354  |         | 6.194  |
|     |         | 9.369  |         | 9.615  |
| 6   | 506.5   | 1.461  | 620.2   | 0.731  |
|     |         | 1.902  |         | 1.638  |
|     |         | 16.543 |         | 15.657 |
| 7   | 656.4   | 0.445  | 724.3   | 11.030 |
|     |         | 0.622  |         | 6.506  |
|     |         | 18.447 |         | 1.556  |
| 8   | 713.7   | 0.252  | 745.7   | 12.466 |
|     |         | 0.961  |         | 7.569  |
|     |         | 18.679 |         | 1.046  |



**Table S10.** Wave functions with definite projection of the total moment  $|m_J\rangle$  for the lowest three Kramers doublets (KDs) of individual  $\text{Dy}^{3+}$  fragments in *D-1*.

|       | $E / K$ | wave functions                                                                                     |
|-------|---------|----------------------------------------------------------------------------------------------------|
|       | 0.0     | 95.4% $ \pm 15/2\rangle$                                                                           |
| Dy1   | 183.6   | 88.4% $ \pm 13/2\rangle$ +4.7% $ \pm 7/2\rangle$                                                   |
|       | 374.2   | 64.8% $ \pm 11/2\rangle$ +6.9% $ \pm 9/2\rangle$ +8.0% $ \pm 3/2\rangle$ +8.8% $ \pm 1/2\rangle$   |
| <hr/> |         |                                                                                                    |
|       | 0.0     | 95.7% $ \pm 15/2\rangle$                                                                           |
| Dy2   | 192.2   | 88.2% $ \pm 13/2\rangle$ +4.8% $ \pm 7/2\rangle$                                                   |
|       | 363.2   | 54.2% $ \pm 11/2\rangle$ +9.7% $ \pm 9/2\rangle$ +14.5% $ \pm 3/2\rangle$ +10.5% $ \pm 1/2\rangle$ |
|       |         | >                                                                                                  |

**Table S11.** Wave functions with definite projection of the total moment  $|m_J\rangle$  for the lowest three Kramers doublets (KDs) of individual  $\text{Dy}^{3+}$  fragments in *D-2*.

|       | $E / K$ | wave functions                                                                                                              |
|-------|---------|-----------------------------------------------------------------------------------------------------------------------------|
|       | 0.0     | 95.3% $ \pm 15/2\rangle$                                                                                                    |
| Dy1   | 180.3   | 84.5% $ \pm 13/2\rangle$ +4.7% $ \pm 11/2\rangle$ +4.4% $ \pm 7/2\rangle$                                                   |
|       | 344.6   | 45.7% $ \pm 11/2\rangle$ +10.0% $ \pm 9/2\rangle$ +4.6% $ \pm 7/2\rangle$ +16.3% $ \pm 3/2\rangle$ +17.9% $ \pm 1/2\rangle$ |
|       |         | >                                                                                                                           |
| <hr/> |         |                                                                                                                             |
|       | 0.0     | 93.5% $ \pm 15/2\rangle$                                                                                                    |
| Dy2   | 192.2   | 88.8% $ \pm 13/2\rangle$ +3.5% $ \pm 9/2\rangle$ +4.7% $ \pm 7/2\rangle$                                                    |
|       | 363.2   | 48.2% $ \pm 11/2\rangle$ +8.4% $ \pm 9/2\rangle$ +6.3% $ \pm 7/2\rangle$ +15.6% $ \pm 3/2\rangle$ +14.5% $ \pm 1/2\rangle$  |

**Table S12.** Wave functions with definite projection of the total moment  $|m_J\rangle$  for the lowest three Kramers doublets (KDs) of individual  $\text{Dy}^{3+}$  fragments in *D-3*.

|       | $E / K$ | wave functions                                                                                                             |
|-------|---------|----------------------------------------------------------------------------------------------------------------------------|
|       | 0.0     | 97.0% $ \pm 15/2\rangle$                                                                                                   |
| Dy1   | 294.5   | 80.0% $ \pm 13/2\rangle$ +8.3% $ \pm 11/2\rangle$ +7.6% $ \pm 9/2\rangle$                                                  |
|       | 419.4   | 41.6% $ \pm 1/2\rangle$ +33.3% $ \pm 3/2\rangle$ +16.3% $ \pm 5/2\rangle$ +4.5% $ \pm 7/2\rangle$                          |
| <hr/> |         |                                                                                                                            |
|       | 0.0     | 95.8% $ \pm 15/2\rangle$                                                                                                   |
| Dy2   | 294.5   | 80.9% $ \pm 13/2\rangle$ +5.4% $ \pm 11/2\rangle$ +9.2% $ \pm 9/2\rangle$                                                  |
|       | 429.5   | 29.7% $ \pm 1/2\rangle$ +29.8% $ \pm 3/2\rangle$ +22.8% $ \pm 5/2\rangle$ +11.0% $ \pm 7/2\rangle$ +4.0% $ \pm 9/2\rangle$ |
| <hr/> |         |                                                                                                                            |
|       | 0.0     | 96.2% $ \pm 15/2\rangle$                                                                                                   |
| Dy3   | 304.5   | 82.5% $ \pm 13/2\rangle$ +6.5% $ \pm 11/2\rangle$ +7.9% $ \pm 9/2\rangle$                                                  |
|       | 472.1   | 52.6% $ \pm 1/2\rangle$ +28.6% $ \pm 3/2\rangle$ +7.7% $ \pm 5/2\rangle$ +4.6% $ \pm 7/2\rangle$                           |
| <hr/> |         |                                                                                                                            |
| Dy4   | 0.0     | 93.6% $ \pm 15/2\rangle$                                                                                                   |
|       | 294.5   | 83.4% $ \pm 13/2\rangle$ +9.3% $ \pm 11/2\rangle$ +3.5% $ \pm 9/2\rangle$                                                  |

429.5      45.4% $|\pm 1/2\rangle$ +30.1% $|\pm 3/2\rangle$ +14.9% $|\pm 5/2\rangle$ +6.0% $|\pm 7/2\rangle$ +1.1% $|\pm 9/2\rangle$

**Table S13.** Wave functions with definite projection of the total moment  $|m_J\rangle$  for the lowest three Kramers doublets (KDs) of individual Dy<sup>3+</sup> fragments in *D-4*.

|     | $E / K$ | wave functions                                                                                      |
|-----|---------|-----------------------------------------------------------------------------------------------------|
| Dy1 | 0.0     | 94.5% $ \pm 15/2\rangle$                                                                            |
|     | 161.0   | 81.5% $ \pm 13/2\rangle$ +7.5% $ \pm 11/2\rangle$ +5.4% $ 7/2\rangle$                               |
|     | 314.0   | 44.8% $ \pm 11/2\rangle$ +17.8% $ \pm 9/2\rangle$ +17.0% $ \pm 3/2\rangle$ +10.4% $ \pm 1/2\rangle$ |
|     |         | >                                                                                                   |
| Dy2 | 0.0     | 95.1% $ \pm 15/2\rangle$                                                                            |
|     | 174.5   | 86.5% $ \pm 13/2\rangle$ +4.6% $ \pm 11/2\rangle$ +4.5% $ 7/2\rangle$                               |
|     | 363.2   | 59.8% $ \pm 11/2\rangle$ +8.1% $ \pm 9/2\rangle$ +10.8% $ \pm 3/2\rangle$ +7.5% $ \pm 1/2\rangle$   |

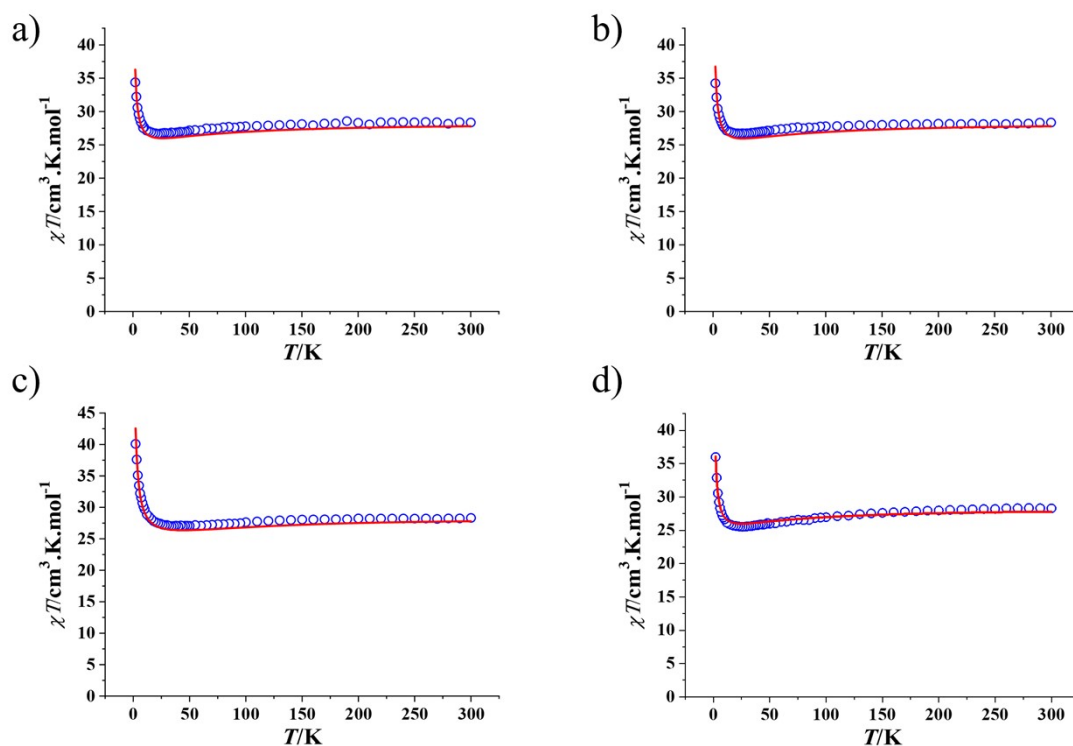

**Fig. S13.** Plot of  $\chi T$  versus  $T$  of *D-1* ( $H_{dc} = 1000$  Oe) (a); Plot of  $\chi T$  versus  $T$  of *D-2* ( $H_{dc} = 1000$  Oe) (b); Plot of  $\chi T$  versus  $T$  of *D-3* ( $H_{dc} = 1000$  Oe), and the simulated results are obtained from Dy1 and Dy2. (c); Plot of  $\chi T$  versus  $T$  of *D-4* ( $H_{dc} = 1000$  Oe) (d); The red line corresponds to the simulated results.

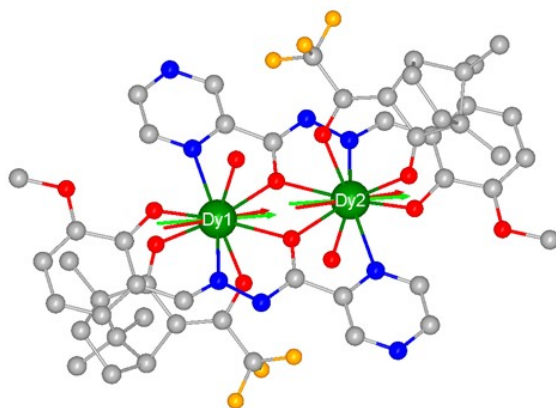

**Fig. S14.** The orientations of easy axis of the KDs on  $\text{Dy}^{3+}$  for *D-1*. The green arrow represents the ground KDs and the red stands for the first excited KDs. Color codes: Dy, green; N, blue; O, red; C, grey; F, light orange. All hydrogens are omitted for clarity.

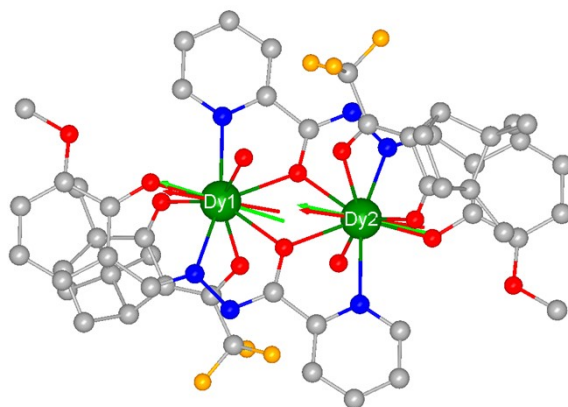

**Fig. S15.** The orientations of easy axis of the KDs on  $\text{Dy}^{3+}$  for *D-2*. The green arrow represents the ground KDs and the red stands for the first excited KDs. Color codes: Dy, green; N, blue; O, red; C, grey; F, light orange. All hydrogens are omitted for clarity.

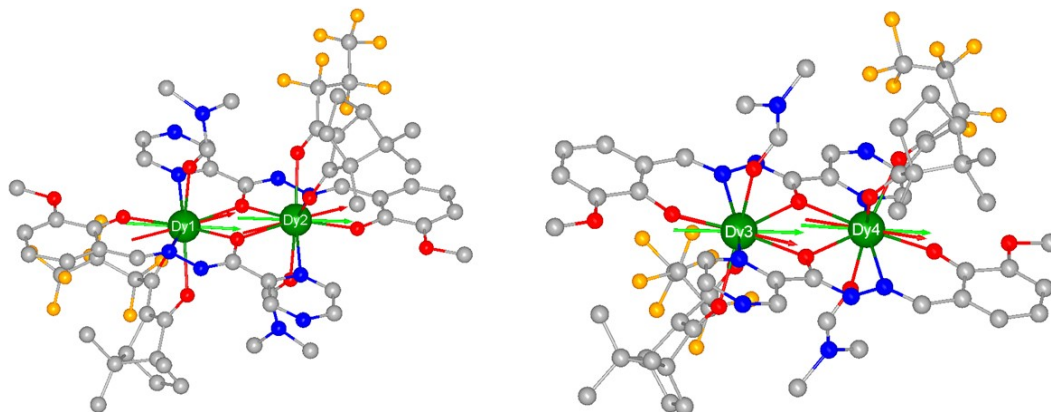

**Fig. S16.** The orientations of easy axis of the KDs on  $\text{Dy}^{3+}$  for *D-3*. The green arrow represents the ground KDs and the red stands for the first excited KDs. Color codes: Dy, green; N, blue; O, red; C, grey; F, light orange. All hydrogens are omitted for clarity.

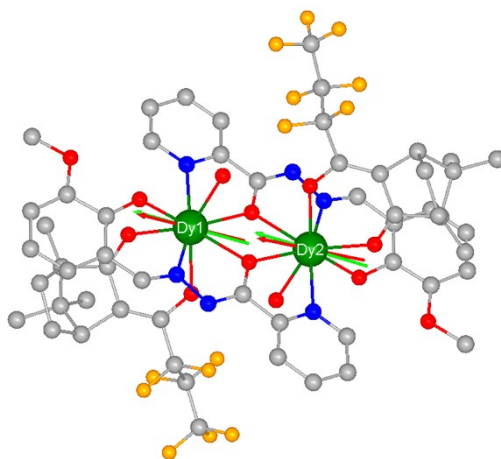

**Fig. S17.** The orientations of easy axis of the KDs on  $\text{Dy}^{3+}$  for *D-4*. The green arrow represents the ground KDs and the red stands for the first excited KDs. Color codes: Dy, green; N, blue; O, red; C, grey; F, light orange. All hydrogens are omitted for clarity.

References:

(1) Aquilante, F.; Autschbach, J.; Carlson, R. K.; Chibotaru, L. F.; Delcey, M. G.; Vico, L. D.; Galván, I. F.; Ferré, N.; Frutos, L. M.; Gagliardi, L.; Garavelli, M.; Giussani, A.; Hoyer, C. E.; Manni, G. L.; Lischka, H.; Ma, D.; Malmqvist, P. Å.; Müller, T.; Nenov, A.; Olivucci, M.; Pedersen, T. B.; Peng, D.; Plasser, F.; Pritchard, B.; Reiher, M.; Rivalta, I.; Schapiro, I.; Segarra-Martí, J.; Stenrup, M.; Truhlar, D. G.; Ungur, L.; Valentini, A.; Vancoillie, S.; Veryazov, V.; Vysotskiy, V. P.; Weingart, O.; Zapata, F.; Lindh, R. Molcas 8: New capabilities for multiconfigurational quantum chemical calculations across the periodic table. *J. Comput. Chem.* **2016**, *37*, 506.

(2) Lines, M. E. Orbital Angular Momentum in the Theory of Paramagnetic Clusters. *J. Chem. Phys.* **1971**, *55*, 2977.

(3) (a) Chibotaru, L. F.; Ungur, L.; Soncini, A. Origin of non-magnetic Kramers doublets in the ground state of dysprosium triangles: Evidence for toroidal magnetic moment. *Angew. Chem. Int. Ed.* **2008**, *47*, 4126; (b) Chibotaru, L. F.; Ungur, L.; Aronica, C.; Elmoll, H.; Pilet, G.; Luneau, D. Structure, magnetism and theoretical study of mixed-valent  $\text{Co}^{\text{II}}_3\text{Co}^{\text{III}}_4$  heptanuclear wheel: Lack of SMM behaviour despite negative magnetic anisotropy. *J. Am. Chem. Soc.* **2008**, *130*, 12445.

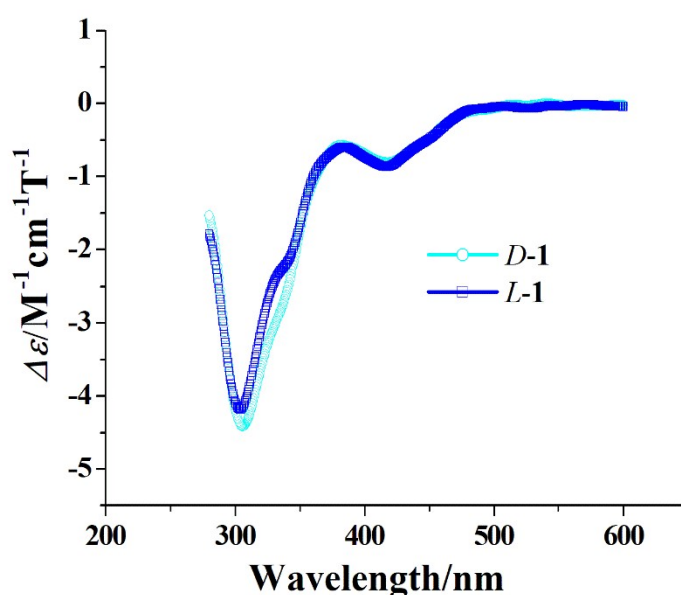

Fig. S18. MCD spectra of *D-1* and *L-1*.

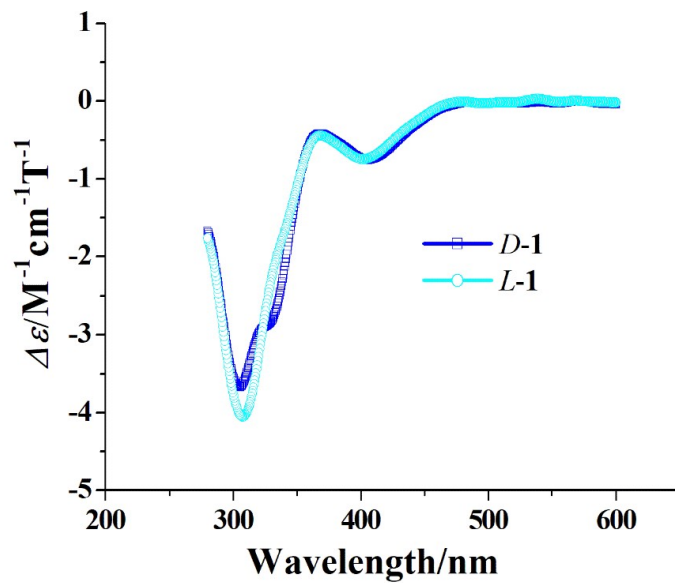

Fig. S19. MCD spectra of *D-2* and *L-2*.

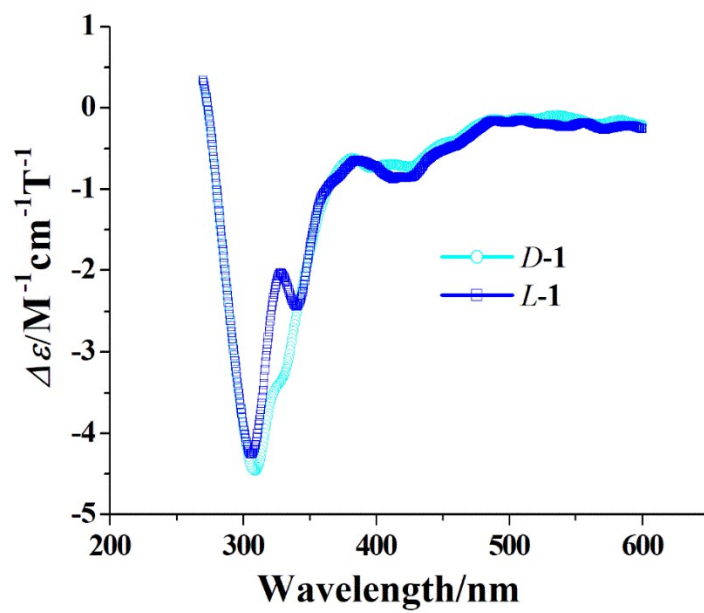

Fig. S20. MCD spectra of *D-3* and *L-3*.

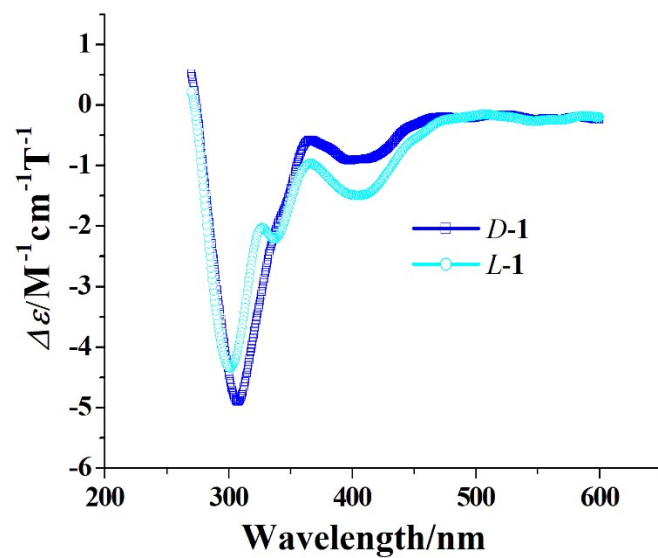

Fig. S21. MCD spectra of *D-4* and *L-4*.

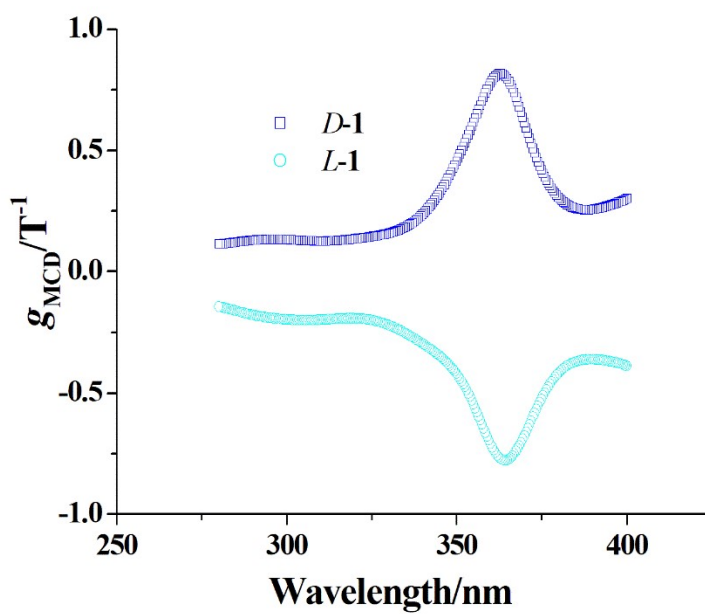

Fig. S22. The wavelength-dependent  $g_{\text{MCD}}$  of *D-1* and *L-1*.

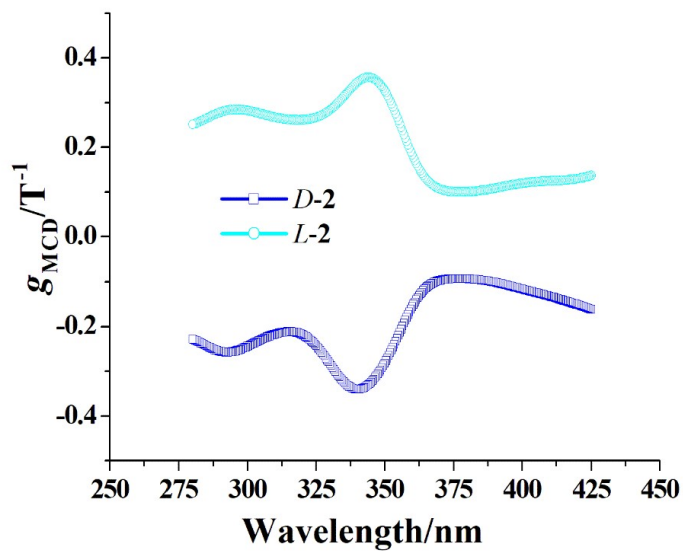

**Fig. S23.** The wavelength-dependent  $g_{\text{MCD}}$  of *D-2* and *L-2*.

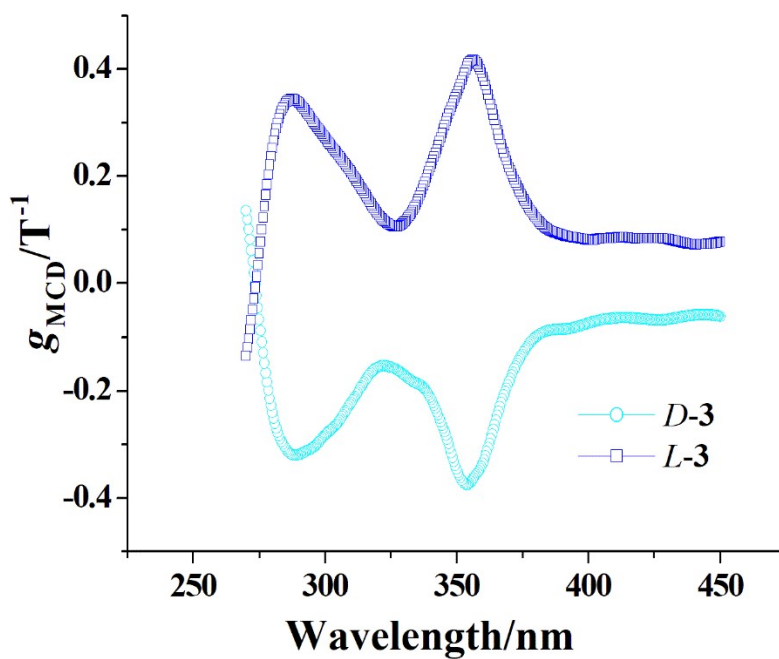

**Fig. S24.** The wavelength-dependent  $g_{\text{MCD}}$  of *D-3* and *L-3*.



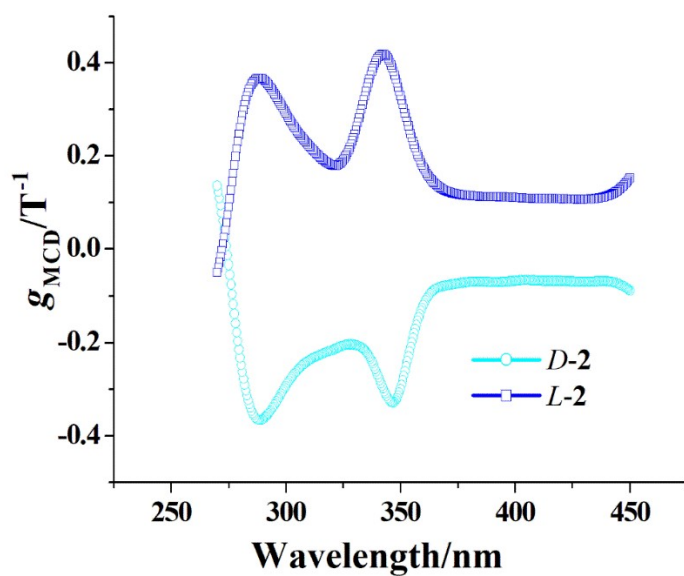

Fig. S25. The wavelength-dependent  $g_{\text{MCD}}$  of *D-4* and *L-4*.

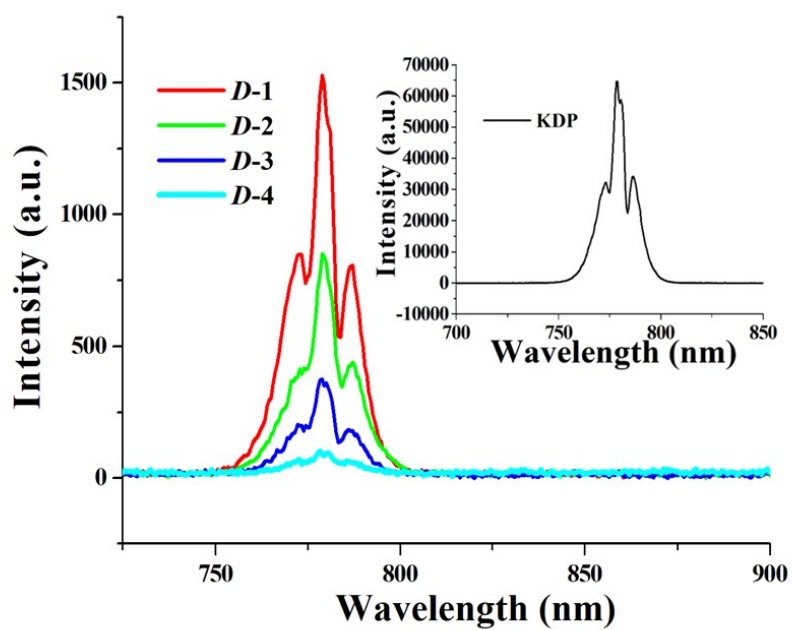

Fig. S26. SHG spectra of crystalline samples of *D-1*, *D-2*, *D-3*, *D-4* and KDP (illustration) under

excitation at  $\lambda = 1550$  nm ( $T_{\text{int}} = 0.5$  s).
